# Supplementary material for: Syntheses, structures and photoluminescent properties of Zn(ii) and Cd(ii) coordination polymers with flexible tripodal triazole-containing ligands
Source: Royal Society of Chemistry journal article supplement (doi:10.1039/c2ce26958a), 2013-01-01
Supplement: c2ce26958a.pdf [file c2ce26958a.pdf]

## Electronic supplementary information

### Syntheses, structures, and photoluminescent properties of Zn(II) and Cd(II) coordination polymers with flexible tripodal triazole-containing ligands

Ying-Ying Liu,<sup>a</sup> Hai-Yan Liu,<sup>b</sup> Jian-Fang Ma,<sup>\*a</sup> Yan Yang<sup>a</sup> and Jin Yang<sup>\*a</sup>

<sup>a</sup> Key Lab for Polyoxometalate Science, Department of Chemistry, Northeast Normal University, Changchun 130024, People's Republic of China

<sup>b</sup> Department of Chemical Engineering, Yingkou University Zone, Yingkou 115014, People's Republic of China

\* Correspondence authors

E-mail: jianfangma@yahoo.com.cn (J.-F. Ma)

Fax: +86-431-85098620 (J.-F. Ma)

E-mail: yangjinnenu@yahoo.com.cn (J. Yang)

**Table S1.** Selected bond distances (Å) and angles (°) for compounds **1-7**.

| <b>1</b>                                     |            |                                              |           |
|----------------------------------------------|------------|----------------------------------------------|-----------|
| Zn(1)-O(2)                                   | 1.963(5)   | Zn(1)-O(3) <sup>#1</sup>                     | 2.006(4)  |
| Zn(1)-N(3)                                   | 2.041(5)   | Zn(1)-N(6) <sup>#2</sup>                     | 2.049(5)  |
| Zn(1)-O(4) <sup>#1</sup>                     | 2.484(5)   |                                              |           |
| O(2)-Zn(1)-O(3) <sup>#1</sup>                | 103.4(2)   | O(2)-Zn(1)-N(3)                              | 115.6(2)  |
| O(3) <sup>#1</sup> -Zn(1)-N(3)               | 112.47(19) | O(2)-Zn(1)-N(6) <sup>#2</sup>                | 94.8(2)   |
| O(3) <sup>#1</sup> -Zn(1)-N(6) <sup>#2</sup> | 119.2(2)   | N(3)-Zn(1)-N(6) <sup>#2</sup>                | 110.2(2)  |
| O(2)-Zn(1)-O(4) <sup>#1</sup>                | 154.15(16) | O(3) <sup>#1</sup> -Zn(1)-O(4) <sup>#1</sup> | 57.08(17) |
| N(3)-Zn(1)-O(4) <sup>#1</sup>                | 89.1(2)    | N(6) <sup>#2</sup> -Zn(1)-O(4) <sup>#1</sup> | 82.9(2)   |
| <b>2</b>                                     |            |                                              |           |
| Cd(1)-O(1)                                   | 2.283(5)   | Cd(1)-N(1)                                   | 2.304(5)  |
| Cd(1)-N(9) <sup>#1</sup>                     | 2.304(5)   | Cd(1)-N(4) <sup>#2</sup>                     | 2.334(5)  |
| Cd(1)-O(4) <sup>#3</sup>                     | 2.364(4)   | Cd(1)-O(3) <sup>#3</sup>                     | 2.575(5)  |
| Cd(1)-O(1W)                                  | 2.608(11)  |                                              |           |
| O(1)-Cd(1)-N(1)                              | 82.64(19)  | O(1)-Cd(1)-N(9) <sup>#1</sup>                | 99.5(2)   |

|                                              |            |                                              |            |
|----------------------------------------------|------------|----------------------------------------------|------------|
| N(1)-Cd(1)-N(9) <sup>#1</sup>                | 89.3(2)    | O(1)-Cd(1)-N(4) <sup>#2</sup>                | 82.1(2)    |
| N(1)-Cd(1)-N(4) <sup>#2</sup>                | 95.3(2)    | N(9) <sup>#1</sup> -Cd(1)-N(4) <sup>#2</sup> | 175.32(19) |
| O(1)-Cd(1)-O(4) <sup>#3</sup>                | 145.38(19) | N(1)-Cd(1)-O(4) <sup>#3</sup>                | 131.39(16) |
| N(9) <sup>#1</sup> -Cd(1)-O(4) <sup>#3</sup> | 88.55(19)  | N(4) <sup>#2</sup> -Cd(1)-O(4) <sup>#3</sup> | 87.68(18)  |
| O(1)-Cd(1)-O(3) <sup>#3</sup>                | 158.06(19) | N(1)-Cd(1)-O(3) <sup>#3</sup>                | 79.41(16)  |
| N(9) <sup>#1</sup> -Cd(1)-O(3) <sup>#3</sup> | 92.77(19)  | N(4) <sup>#2</sup> -Cd(1)-O(3) <sup>#3</sup> | 87.10(18)  |
| O(4) <sup>#3</sup> -Cd(1)-O(3) <sup>#3</sup> | 52.23(14)  | O(1)-Cd(1)-O(1W)                             | 70.7(3)    |
| N(1)-Cd(1)-O(1W)                             | 147.5(2)   | N(9) <sup>#1</sup> -Cd(1)-O(1W)              | 77.5(3)    |
| N(4) <sup>#2</sup> -Cd(1)-O(1W)              | 99.0(3)    | O(4) <sup>#3</sup> -Cd(1)-O(1W)              | 78.5(2)    |
| O(3) <sup>#3</sup> -Cd(1)-O(1W)              | 130.1(2)   |                                              |            |

### 3

|                                |          |                                              |           |
|--------------------------------|----------|----------------------------------------------|-----------|
| Zn(1)-O(7) <sup>#1</sup>       | 1.956(6) | Zn(1)-O(1)                                   | 1.980(6)  |
| Zn(1)-N(1)                     | 1.990(8) | Zn(1)-N(6) <sup>#2</sup>                     | 2.054(8)  |
| Zn(2)-O(5)                     | 1.929(6) | Zn(2)-O(3)                                   | 1.967(6)  |
| Zn(2)-O(1W)                    | 1.985(8) | Zn(2)-N(9) <sup>#3</sup>                     | 1.989(10) |
| O(7) <sup>#1</sup> -Zn(1)-O(1) | 115.9(3) | O(7) <sup>#1</sup> -Zn(1)-N(1)               | 113.2(3)  |
| O(1)-Zn(1)-N(1)                | 120.3(3) | O(7) <sup>#1</sup> -Zn(1)-N(6) <sup>#2</sup> | 101.9(3)  |
| O(1)-Zn(1)-N(6) <sup>#2</sup>  | 93.4(3)  | N(1)-Zn(1)-N(6) <sup>#2</sup>                | 107.8(3)  |
| O(5)-Zn(2)-O(3)                | 110.6(3) | O(5)-Zn(2)-O(1W)                             | 103.8(4)  |
| O(3)-Zn(2)-O(1W)               | 96.6(3)  | O(5)-Zn(2)-N(9) <sup>#3</sup>                | 117.4(3)  |
| O(3)-Zn(2)-N(9) <sup>#3</sup>  | 119.8(3) | O(1W)-Zn(2)-N(9) <sup>#3</sup>               | 104.6(4)  |

### 4

|                                              |            |                                              |            |
|----------------------------------------------|------------|----------------------------------------------|------------|
| Cd(1)-O(8) <sup>#1</sup>                     | 2.209(4)   | Cd(1)-O(6) <sup>#2</sup>                     | 2.226(3)   |
| Cd(1)-O(3)                                   | 2.298(3)   | Cd(1)-N(5)                                   | 2.317(4)   |
| Cd(1)-N(3) <sup>#3</sup>                     | 2.318(5)   | Cd(1)-O(4)                                   | 2.498(5)   |
| Cd(2)-O(7) <sup>#4</sup>                     | 2.238(3)   | Cd(2)-O(5) <sup>#5</sup>                     | 2.250(3)   |
| Cd(2)-N(9) <sup>#5</sup>                     | 2.281(5)   | Cd(2)-O(1)                                   | 2.334(3)   |
| Cd(2)-N(1)                                   | 2.357(4)   | Cd(2)-O(2)                                   | 2.439(3)   |
| O(8) <sup>#1</sup> -Cd(1)-O(6) <sup>#2</sup> | 119.24(14) | O(8) <sup>#1</sup> -Cd(1)-O(3)               | 96.43(13)  |
| O(6) <sup>#2</sup> -Cd(1)-O(3)               | 144.30(13) | O(8) <sup>#1</sup> -Cd(1)-N(3) <sup>#3</sup> | 100.13(16) |
| O(6) <sup>#2</sup> -Cd(1)-N(3) <sup>#3</sup> | 86.44(15)  | O(3)-Cd(1)-N(3) <sup>#3</sup>                | 88.92(15)  |
| O(8) <sup>#1</sup> -Cd(1)-N(5)               | 96.29(19)  | O(6) <sup>#2</sup> -Cd(1)-N(5)               | 86.94(17)  |
| O(3)-Cd(1)-N(5)                              | 87.67(17)  | N(3) <sup>#3</sup> -Cd(1)-N(5)               | 163.50(19) |
| O(8) <sup>#1</sup> -Cd(1)-O(4)               | 150.71(13) | O(6) <sup>#2</sup> -Cd(1)-O(4)               | 89.99(12)  |
| O(3)-Cd(1)-O(4)                              | 54.31(11)  | N(3) <sup>#3</sup> -Cd(1)-O(4)               | 82.31(14)  |

|                                              |            |                                              |            |
|----------------------------------------------|------------|----------------------------------------------|------------|
| N(5)-Cd(1)-O(4)                              | 82.59(17)  | O(7) <sup>#4</sup> -Cd(2)-O(5) <sup>#5</sup> | 122.57(13) |
| O(7) <sup>#4</sup> -Cd(2)-N(9) <sup>#5</sup> | 92.37(16)  | O(5) <sup>#5</sup> -Cd(2)-N(9) <sup>#5</sup> | 88.63(16)  |
| O(7) <sup>#4</sup> -Cd(2)-O(1)               | 144.38(13) | O(5) <sup>#5</sup> -Cd(2)-O(1)               | 92.82(13)  |
| N(9) <sup>#5</sup> -Cd(2)-O(1)               | 92.49(16)  | O(7) <sup>#4</sup> -Cd(2)-N(1)               | 88.59(14)  |
| O(5) <sup>#5</sup> -Cd(2)-N(1)               | 82.72(14)  | N(9) <sup>#5</sup> -Cd(2)-N(1)               | 170.29(17) |
| O(1)-Cd(2)-N(1)                              | 92.34(14)  | O(7) <sup>#4</sup> -Cd(2)-O(2)               | 89.95(12)  |
| O(5) <sup>#5</sup> -Cd(2)-O(2)               | 147.23(12) | N(9) <sup>#5</sup> -Cd(2)-O(2)               | 94.46(17)  |
| O(1)-Cd(2)-O(2)                              | 54.49(12)  | N(1)-Cd(2)-O(2)                              | 95.21(13)  |

## 5

|                                              |          |                                 |          |
|----------------------------------------------|----------|---------------------------------|----------|
| Zn(1)-O(3)                                   | 1.973(4) | Zn(1)-O(5)                      | 1.974(5) |
| Zn(1)-N(10)                                  | 2.017(6) | Zn(1)-N(17) <sup>#1</sup>       | 2.062(5) |
| Zn(2)-O(11)                                  | 1.956(4) | Zn(2)-O(9)                      | 1.963(4) |
| Zn(2)-N(4)                                   | 2.018(5) | Zn(2)-N(15) <sup>#2</sup>       | 2.035(5) |
| Zn(3)-O(2)                                   | 1.959(4) | Zn(3)-O(8) <sup>#3</sup>        | 1.962(5) |
| Zn(3)-N(1)                                   | 2.020(5) | Zn(3)-N(8) <sup>#4</sup>        | 2.024(5) |
| O(3)-Zn(1)-O(5)                              | 106.9(2) | O(3)-Zn(1)-N(10)                | 113.2(2) |
| O(5)-Zn(1)-N(10)                             | 120.8(2) | O(3)-Zn(1)-N(17) <sup>#1</sup>  | 110.7(2) |
| O(5)-Zn(1)-N(17) <sup>#1</sup>               | 92.2(2)  | N(10)-Zn(1)-N(17) <sup>#1</sup> | 111.0(2) |
| O(11)-Zn(2)-O(9)                             | 106.6(2) | O(11)-Zn(2)-N(4)                | 109.3(2) |
| O(9)-Zn(2)-N(4)                              | 114.8(2) | O(11)-Zn(2)-N(15) <sup>#2</sup> | 92.0(2)  |
| O(9)-Zn(2)-N(15) <sup>#2</sup>               | 115.6(2) | N(4)-Zn(2)-N(15) <sup>#2</sup>  | 115.4(2) |
| O(2)-Zn(3)-O(8) <sup>#3</sup>                | 105.4(2) | O(2)-Zn(3)-N(1)                 | 115.8(2) |
| O(8) <sup>#3</sup> -Zn(3)-N(1)               | 92.3(2)  | O(2)-Zn(3)-N(8) <sup>#4</sup>   | 110.4(2) |
| O(8) <sup>#3</sup> -Zn(3)-N(8) <sup>#4</sup> | 110.3(2) | N(1)-Zn(3)-N(8) <sup>#4</sup>   | 120.0(2) |

## 6

|                                |            |                                              |            |
|--------------------------------|------------|----------------------------------------------|------------|
| Zn(1)-O(3) <sup>#1</sup>       | 1.928(3)   | Zn(1)-O(1)                                   | 1.936(4)   |
| Zn(1)-N(7) <sup>#2</sup>       | 2.015(4)   | Zn(1)-N(1)                                   | 2.028(5)   |
| O(3) <sup>#1</sup> -Zn(1)-O(1) | 111.86(16) | O(3) <sup>#1</sup> -Zn(1)-N(7) <sup>#2</sup> | 119.02(17) |
| O(1)-Zn(1)-N(7) <sup>#2</sup>  | 97.58(17)  | O(3) <sup>#1</sup> -Zn(1)-N(1)               | 109.99(18) |
| O(1)-Zn(1)-N(1)                | 109.97(17) | N(7) <sup>#2</sup> -Zn(1)-N(1)               | 107.67(18) |

## 7

|                               |           |                               |            |
|-------------------------------|-----------|-------------------------------|------------|
| Cd(1)-O(1)                    | 2.264(3)  | Cd(1)-N(8) <sup>#1</sup>      | 2.307(3)   |
| Cd(1)-N(5) <sup>#2</sup>      | 2.336(3)  | Cd(1)-O(4) <sup>#3</sup>      | 2.390(3)   |
| Cd(1)-O(3) <sup>#3</sup>      | 2.427(3)  | Cd(1)-N(1)                    | 2.432(4)   |
| O(1)-Cd(1)-N(8) <sup>#1</sup> | 87.08(11) | O(1)-Cd(1)-N(5) <sup>#2</sup> | 102.28(11) |

|                                              |            |                                              |            |
|----------------------------------------------|------------|----------------------------------------------|------------|
| N(8) <sup>#1</sup> -Cd(1)-N(5) <sup>#2</sup> | 168.36(11) | O(1)-Cd(1)-O(4) <sup>#3</sup>                | 171.43(10) |
| N(8) <sup>#1</sup> -Cd(1)-O(4) <sup>#3</sup> | 84.44(10)  | N(5) <sup>#2</sup> -Cd(1)-O(4) <sup>#3</sup> | 86.01(11)  |
| O(1)-Cd(1)-O(3) <sup>#3</sup>                | 126.37(11) | N(8) <sup>#1</sup> -Cd(1)-O(3) <sup>#3</sup> | 87.45(10)  |
| N(5) <sup>#2</sup> -Cd(1)-O(3) <sup>#3</sup> | 92.39(11)  | O(4) <sup>#3</sup> -Cd(1)-O(3) <sup>#3</sup> | 54.45(10)  |

Symmetry codes for **1**: <sup>#1</sup> -x+1, -y+1, -z+1; <sup>#2</sup> x, y+1, z+1. For **2**: <sup>#1</sup> x, -y, z+1/2, <sup>#2</sup> x-1/2, y-1/2, z; <sup>#3</sup> -x+3/2, y+1/2, -z+3/2. For **3**: <sup>#1</sup> -x+2, y-1/2, -z+3/2; <sup>#2</sup> x, y-1, z; <sup>#3</sup> -x+2, -y, -z+1. For **4**: <sup>#1</sup> x+1/2, -y+1/2, z+1/2; <sup>#2</sup> x-1, y, z; <sup>#3</sup> -x-1/2, y-1/2, -z+1/2; <sup>#4</sup> x+1, y, z; <sup>#5</sup> x-1/2, -y+1/2, z-1/2. For **5**: <sup>#1</sup> -x+1, -y+1, -z+1; <sup>#2</sup> -x+2, -y+1, -z+2; <sup>#3</sup> x+1, y, z+1; <sup>#4</sup> -x+3, -y, -z+2. For **6**: <sup>#1</sup> -x+1, -y, -z+1; <sup>#2</sup> x, y, z+1. For **7**: <sup>#1</sup> x-1, y, z; <sup>#2</sup> y+3/2, -x+3/2, z+1/4; <sup>#3</sup> x-1/2, -y+1/2, -z+1/4.

**Table S2.** Hydrogen-bonding parameters for **3**, **5** and **6** (in Å and deg)

|                                  | D-H...A | d(D-H)   | d(D...A)  | ∠(D-H...A) |
|----------------------------------|---------|----------|-----------|------------|
| <b>3</b>                         |         |          |           |            |
| O(1W)-H(1B)...O(6) <sup>#4</sup> | 0.89(2) | 1.76(6)  | 2.616(10) | 160(15)    |
| O(1W)-H(1A)...O(8) <sup>#5</sup> | 0.89(2) | 1.83(5)  | 2.692(9)  | 162(15)    |
| <b>5</b>                         |         |          |           |            |
| O(1W)-H(1B)...O(12)              | 0.90(2) | 2.4(2)   | 3.032(17) | 128(21)    |
| O(1W)-H(1A)...O(1) <sup>#5</sup> | 0.91(2) | 2.5(3)   | 3.11(2)   | 124(25)    |
| <b>6</b>                         |         |          |           |            |
| O(1W)-H(1B)...O(2)               | 0.87(2) | 2.05(12) | 2.836(11) | 150(21)    |
| O(1W)-H(1A)...N(4) <sup>#3</sup> | 0.87(2) | 2.27(19) | 2.99(2)   | 140(25)    |

Symmetry codes for **3**: <sup>#4</sup> -x+3, -y, -z+2; <sup>#5</sup> x, -y+1/2, z-1/2. For **5**: <sup>#5</sup> -x+2, -y, -z+2.

For **6**: <sup>#3</sup> -x, -y+1, -z.

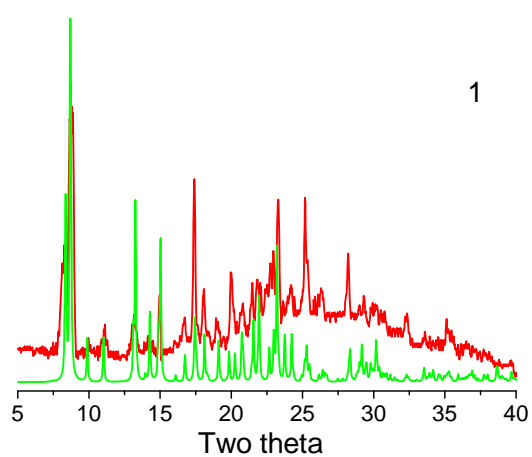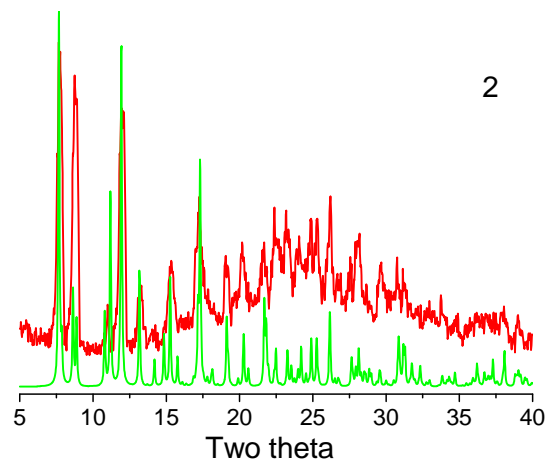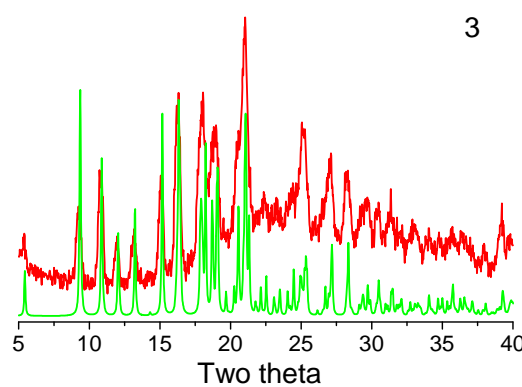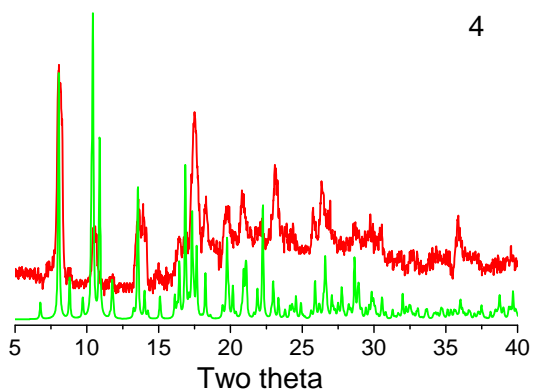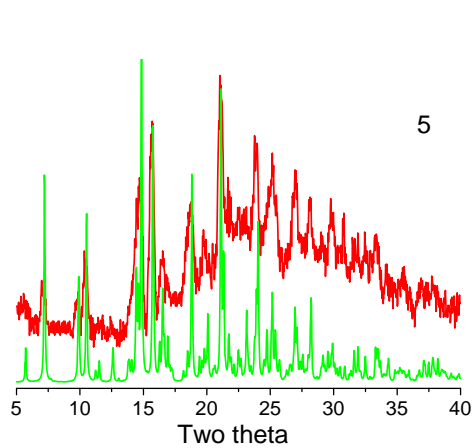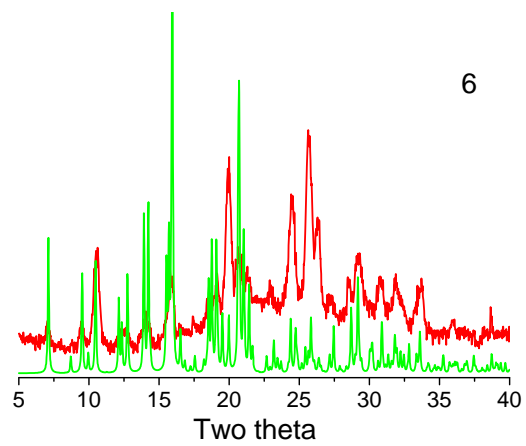

7

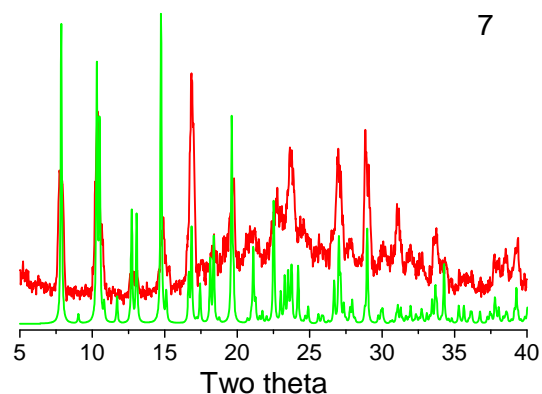

**Fig. S1** The simulated (green) and experimental (red) XRPD patterns for the compounds **1-7** (the diffraction peaks of both simulated and experimental patterns match well in relevant positions, indicating that the phase purities of compounds **1-7** are good).

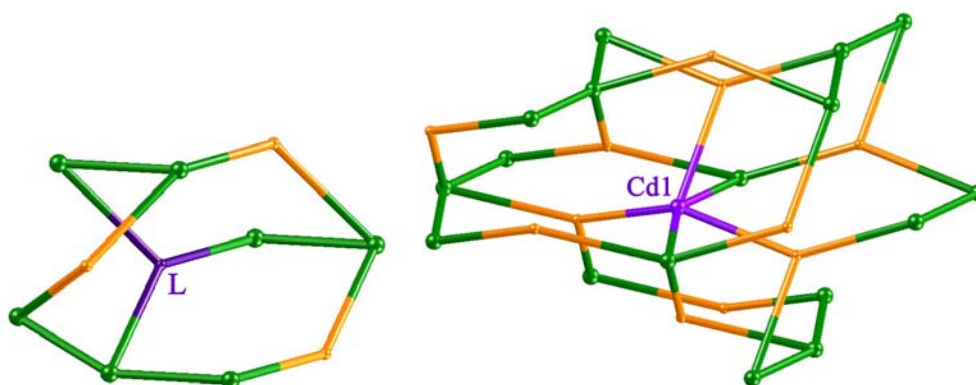

**Fig. S2.** View of the 3- and 5-connected nodes of **2**.

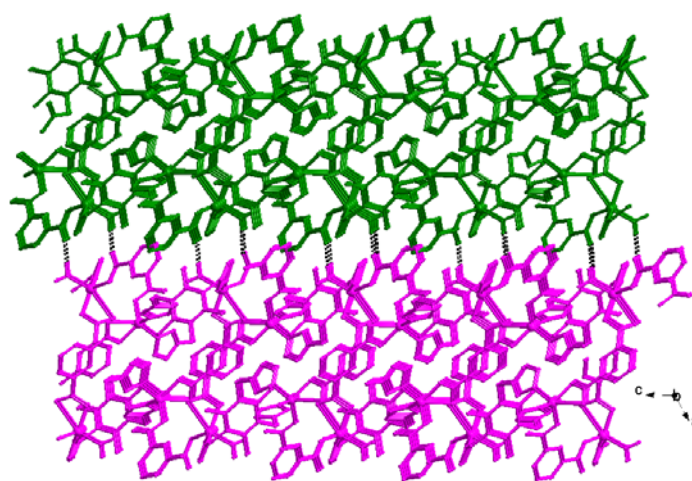

**Fig. S3.** View of the 3D supramolecular architecture of **3** connected by hydrogen bonding interactions of neighboring layers.

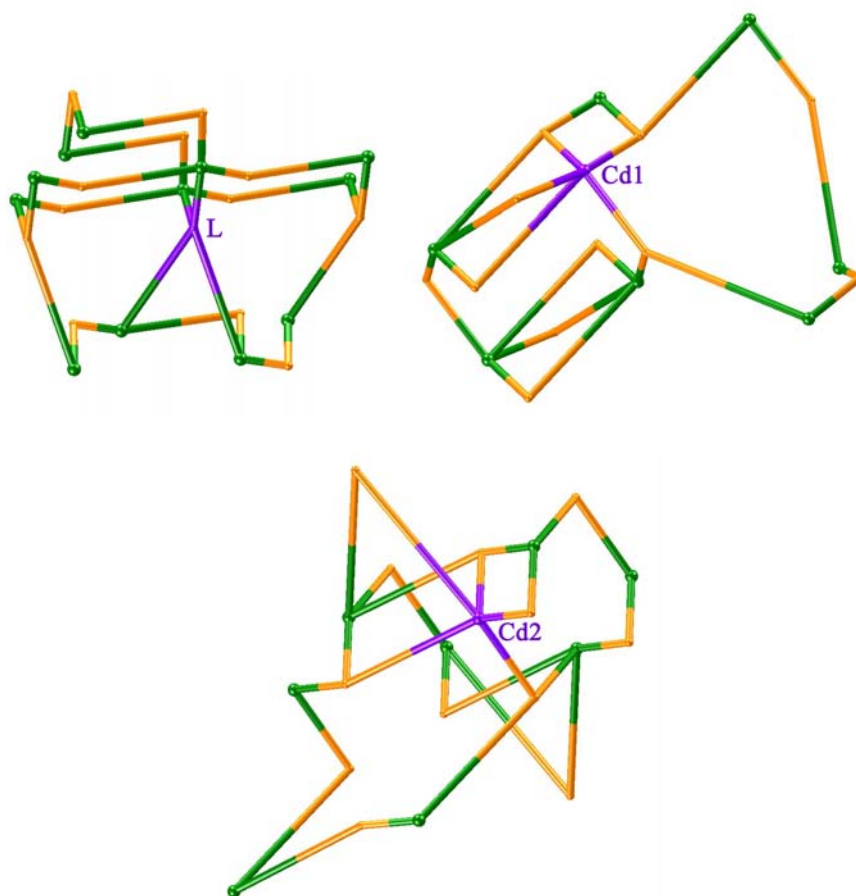

**Fig. S4.** View of the 4-connected and 5-connected nodes of **4**.

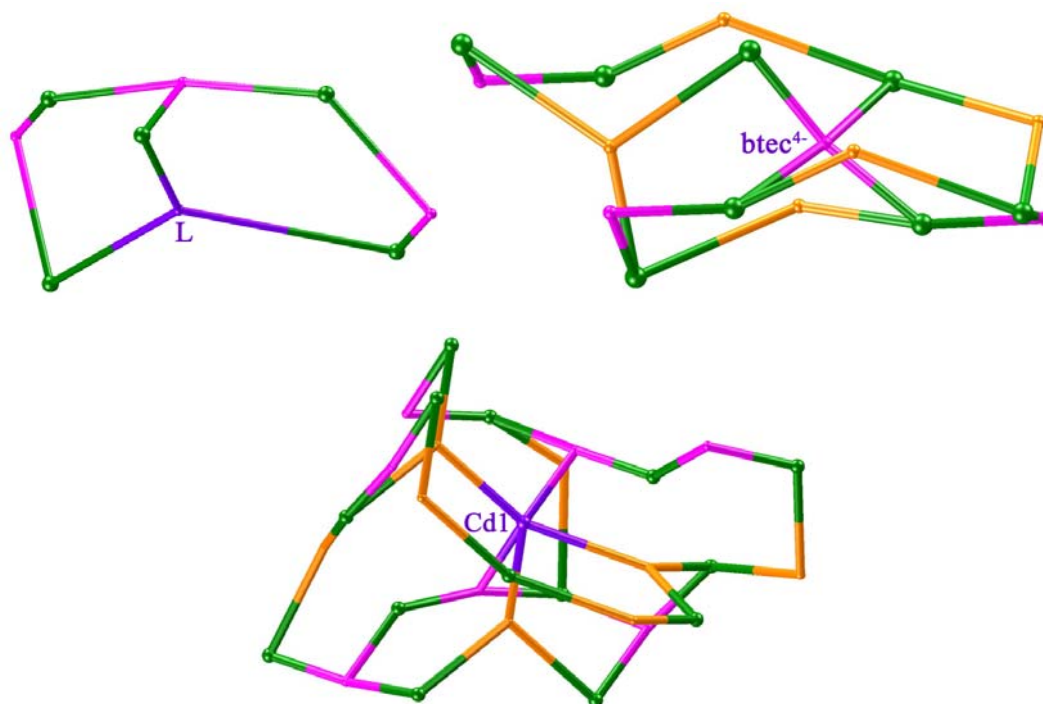

**Fig. S5.** View of the 3-connected, 4-connected and 5-connected nodes of **7**.

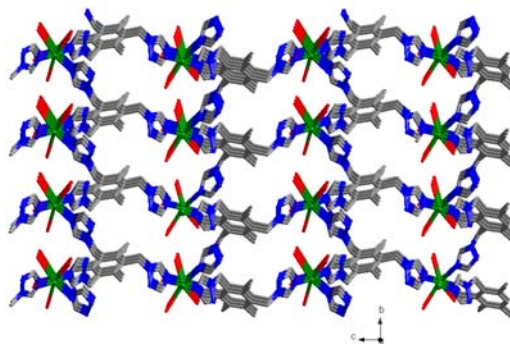

(a)

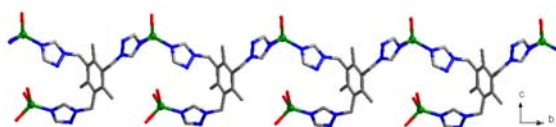

(b)

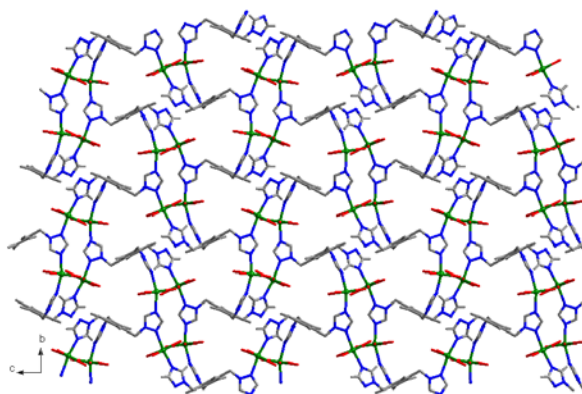

(c)

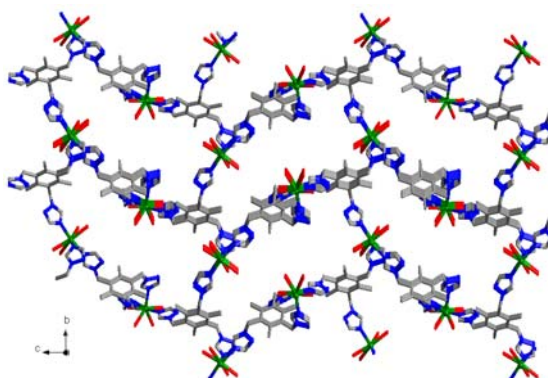

(d)

**Fig. S6.** View of the L connected M(II) structures in **2** (a), **3** (b), **4** (c), and **7** (d).



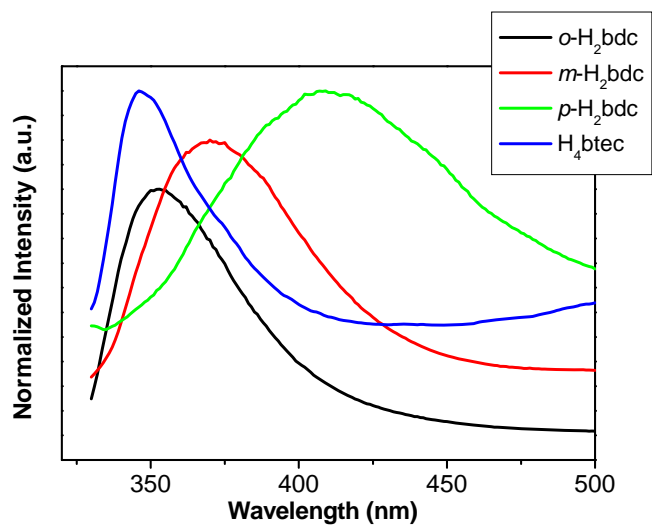

(a)

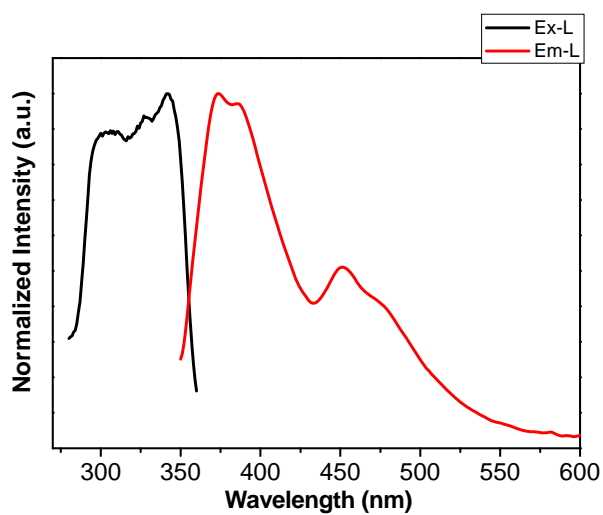

(b)

**Fig. S7.** (a) Solid-state emission spectra of free *o*-H<sub>2</sub>bdc, *m*-H<sub>2</sub>bdc, *p*-H<sub>2</sub>bdc, H<sub>4</sub>btcc ligands at room temperature. (b) The excitation and emission spectra of L ligand at room temperature.
